# Supplementary material for: Incidence of respiratory syncytial virus related health care utilization in the United States
Source: PubMed Central journal article supplement (PMC7568930; doi:10.7189/jogh.10.020422), 2020-12
Supplement: jogh-10-020422-s001.pdf [file jogh-10-020422-s001.pdf]

## S1 Appendix. High-risk conditions

| HIGH RISK CATEGORY               | HIGH-RISK SUB-CATEGORY                                    | ICD-9-CM CODES                                   |
|----------------------------------|-----------------------------------------------------------|--------------------------------------------------|
| Chronic cardiac disease          | Acute rheumatic fever                                     | 391–392                                          |
|                                  | Chronic rheumatic heart disease                           | 393–398                                          |
|                                  | Hypertensive heart disease                                | 402, 404                                         |
|                                  | Ischemic heart disease                                    | 410–414                                          |
|                                  | Diseases of pulmonary circulation                         | 416, 417                                         |
|                                  | Other forms of heart disease                              | 421, 423, 424, 425, 427.1–427.5, 427.8, 428, 429 |
|                                  | Atherosclerosis, polyarteritis nodosa                     | 440, 446                                         |
|                                  | Congenital anomalies                                      | 745–747                                          |
|                                  | Surgical/device conditions                                | V42.1, V45.0, V45.81, V45.82                     |
|                                  | Cardiovascular syphilis                                   | 093                                              |
|                                  | Candidal endocarditis                                     | 11281                                            |
| Myocarditis due to toxoplasmosis | 1303                                                      |                                                  |
| Chronic pulmonary                | Other metabolic and immunity disorders                    | 277.0, 277.6                                     |
|                                  | COPD and allied conditions                                | 491–496                                          |
|                                  | Pneumoconioses/other lung diseases due to external agents | 500–506, 507.0, 507.1, 508                       |
|                                  | Other diseases of respiratory system                      | 510, 513–517, 518.0–518.3, 519.0, 519.9          |
|                                  | Congenital anomalies                                      | 748.4–748.6, 759.3                               |
|                                  | Lung transplant                                           | V426                                             |
|                                  | Tuberculosis                                              | 011, 012                                         |
|                                  | Diseases due to other mycobacteria                        | 031.0                                            |
| Sarcoidosis                      | 135                                                       |                                                  |
| Chronic renal disease            | Hypertensive renal disease                                | 403                                              |
|                                  | Nephritis, nephrotic syndrome, nephrosis                  | 581–583, 585–587, 588.0, 588.1                   |
|                                  | Chronic pyelonephritis                                    | 590.0                                            |
|                                  | Other specified disorders of kidney and ureter            | 593.8                                            |
|                                  | Dialysis and transplant                                   | V42.0, V45.1, V56                                |
| Diabetes mellitus                | Diabetes mellitus                                         | 250, 251, 648.0                                  |
|                                  | Complications of diabetes                                 | 357.2, 362.0, 362.11, 366.41                     |
| Hemoglobinopathies               | Anemias                                                   | 282–284                                          |
| Immunosuppressive disorders      | HIV/retroviral disease                                    | 042–044, 079.5, V08                              |
|                                  | Disorders involving immune mechanism                      | 279                                              |
|                                  | Diseases of blood and blood-forming organs                | 288.0, 288.1, 288.2                              |

|                                        |                                                          |                                        |
|----------------------------------------|----------------------------------------------------------|----------------------------------------|
|                                        | Polyarteritis nodosa                                     | 446                                    |
|                                        | Diseases of musculoskeletal system and connective tissue | 710.0, 710.2, 710.4, 714               |
|                                        | Organ/tissue transplants                                 | V420–V422, V426–V429                   |
|                                        | Radiation/chemotherapy                                   | V580, V581                             |
| Malignancies                           |                                                          | 140–208                                |
| Other metabolic and immunity disorders | Disorders of adrenal glands                              | 255                                    |
|                                        | Other disorders                                          | 270, 271, 277.2, 277.3, 277.5, 277.8   |
| Liver diseases                         | Chronic liver disease and cirrhosis                      | 571                                    |
|                                        | Liver abscess and sequelae of chronic liver disease      | 572.1–572.8                            |
| Neurological/<br>musculoskeletal       | Psychotic conditions                                     | 290, 294.1                             |
|                                        | Mental retardation                                       | 318.1, 318.2                           |
|                                        | Hereditary and degenerative diseases of CNS              | 330, 331, 333.0, 333.4–333.9, 334, 335 |
|                                        | Other disorders of CNS                                   | 340, 341, 343, 344.0                   |
|                                        | Disorders of peripheral nervous system                   | 358.0, 358.1, 359.1, 359.2             |
|                                        | Late effects of CVD                                      | 438                                    |
|                                        | Chondrodystrophy                                         | 756.4                                  |

**S1 Table. Incidence of RSV-associated disease, 2008–2014**

| Age group          | Rate/1,000 person-years<br>(95% CI) | 2008             | 2009             | 2010             | 2011             | 2012             | 2013             | 2014             | 2008–2014<br>Average |
|--------------------|-------------------------------------|------------------|------------------|------------------|------------------|------------------|------------------|------------------|----------------------|
| <b>Overall</b>     | RSV-associated                      | 2.5 (2.5–2.5)    | 2.6 (2.5–2.6)    | 2.4 (2.4–2.4)    | 2.5 (2.5–2.5)    | 2.5 (2.5–2.5)    | 2.3 (2.3–2.4)    | 2.0 (2.0–2.0)    | 2.4                  |
|                    | RSV-coded                           | 1.5 (1.5–1.5)    | 1.6 (1.5–1.6)    | 1.5 (1.5–1.5)    | 1.5 (1.5–1.6)    | 1.6 (1.6–1.6)    | 1.4 (1.4–1.5)    | 1.1 (1.1–1.1)    | 1.5                  |
|                    | RSV assumption for pneumonia        | 0.8 (0.8–0.8)    | 0.8 (0.8–0.8)    | 0.7 (0.7–0.7)    | 0.8 (0.8–0.8)    | 0.8 (0.8–0.8)    | 0.7 (0.7–0.7)    | 0.7 (0.7–0.7)    | 0.8                  |
|                    | RSV assumption for bronchiolitis    | 0.2 (0.2–0.2)    | 0.2 (0.2–0.2)    | 0.2 (0.2–0.2)    | 0.2 (0.2–0.2)    | 0.1 (0.1–0.1)    | 0.2 (0.2–0.2)    | 0.2 (0.2–0.2)    | 0.2                  |
| <b>&lt;1 year</b>  | RSV-associated                      | 75.0 (74.1–75.9) | 77.6 (76.7–78.5) | 78.6 (77.7–79.4) | 82.2 (81.4–83.0) | 86.6 (85.7–87.4) | 83.8 (82.9–84.7) | 69.2 (68.4–70)   | 79.0                 |
|                    | RSV-coded                           | 63.0 (62.1–63.8) | 64.7 (63.9–65.5) | 67.5 (66.7–68.3) | 72.0 (71.2–72.8) | 75.7 (74.9–76.5) | 73.5 (72.6–74.3) | 57.2 (56.5–57.9) | 67.6                 |
|                    | RSV assumption for pneumonia        | 0.4 (0.3–0.4)    | 0.3 (0.3–0.4)    | 0.0 (0.0–0.0)    | 0.0 (0.0–0.0)    | 0.0 (0.0–0.0)    | 0.0 (0.0–0.0)    | 0.1 (0.1–0.2)    | 0.1                  |
|                    | RSV assumption for bronchiolitis    | 11.7 (11.3–12.1) | 12.5 (12.2–12.9) | 11.1 (10.8–11.4) | 10.2 (9.9–10.5)  | 10.8 (10.5–11.1) | 10.3 (10.0–10.6) | 11.9 (11.5–12.2) | 11.2                 |
| <b>1 year</b>      | RSV-associated                      | 35.7 (35.1–36.3) | 39.1 (38.5–39.7) | 40.8 (40.2–41.4) | 43.0 (42.4–43.6) | 45.4 (44.8–46.0) | 41.6 (41.0–42.2) | 36.6 (36.0–37.1) | 40.3                 |
|                    | RSV-coded                           | 22.2 (21.7–22.6) | 24.6 (24.1–25.1) | 27.3 (26.8–27.7) | 29.6 (29.2–30.1) | 31.9 (31.4–32.4) | 29.4 (28.8–29.9) | 24.3 (23.8–24.8) | 27.0                 |
|                    | RSV assumption for pneumonia        | 4.9 (4.6–5.1)    | 4.9 (4.7–5.1)    | 4.3 (4.1–4.5)    | 4.1 (4.0–4.3)    | 3.9 (3.8–4.1)    | 3.6 (3.5–3.8)    | 3.6 (3.4–3.8)    | 4.2                  |
|                    | RSV assumption for bronchiolitis    | 8.7 (8.4–9.0)    | 9.7 (9.4–10.0)   | 9.3 (9.0–9.6)    | 9.2 (9.0–9.5)    | 9.5 (9.3–9.8)    | 8.6 (8.3–8.9)    | 8.6 (8.3–8.9)    | 9.1                  |
| <b>2–4 years</b>   | RSV-associated                      | 12.9 (12.7–13.1) | 14.3 (14.1–14.5) | 14.4 (14.2–14.6) | 14.8 (14.7–15.0) | 15.7 (15.5–15.9) | 14.1 (13.9–14.3) | 12.2 (12.0–12.4) | 14.1                 |
|                    | RSV-coded                           | 4.8 (4.7–5.0)    | 5.8 (5.6–5.9)    | 6.2 (6.1–6.4)    | 6.5 (6.3–6.6)    | 7.1 (7.0–7.2)    | 6.6 (6.5–6.7)    | 5.3 (5.2–5.4)    | 6.0                  |
|                    | RSV assumption for pneumonia        | 5.1 (5.0–5.2)    | 5.4 (5.2–5.5)    | 5.1 (4.9–5.2)    | 5.3 (5.2–5.4)    | 5.4 (5.2–5.5)    | 4.7 (4.6–4.8)    | 4.2 (4.1–4.3)    | 5.0                  |
|                    | RSV assumption for bronchiolitis    | 3.0 (2.9–3.1)    | 3.2 (3.1–3.3)    | 3.1 (3.0–3.2)    | 3.1 (3.0–3.2)    | 3.3 (3.2–3.3)    | 2.8 (2.7–2.9)    | 2.7 (2.6–2.8)    | 3.0                  |
| <b>5–17 years</b>  | RSV-associated                      | 1.5 (1.5–1.5)    | 1.8 (1.8–1.8)    | 1.4 (1.4–1.5)    | 1.6 (1.6–1.7)    | 1.6 (1.6–1.6)    | 1.3 (1.3–1.3)    | 1.2 (1.1–1.2)    | 1.5                  |
|                    | RSV-coded                           | 0.5 (0.5–0.6)    | 0.7 (0.7–0.7)    | 0.5 (0.5–0.6)    | 0.5 (0.5–0.6)    | 0.5 (0.5–0.5)    | 0.4 (0.4–0.5)    | 0.4 (0.3–0.4)    | 0.5                  |
|                    | RSV assumption for pneumonia        | 0.8 (0.8–0.8)    | 0.9 (0.9–0.9)    | 0.8 (0.8–0.8)    | 1.0 (0.9–1.0)    | 0.9 (0.9–1.0)    | 0.7 (0.7–0.8)    | 0.7 (0.7–0.7)    | 0.8                  |
|                    | RSV assumption for bronchiolitis    | 0.1 (0.1–0.2)    | 0.2 (0.2–0.2)    | 0.1 (0.1–0.1)    | 0.1 (0.1–0.1)    | 0.1 (0.1–0.1)    | 0.1 (0.1–0.1)    | 0.1 (0.1–0.1)    | 0.1                  |
| <b>18–49 years</b> | RSV-associated                      | 0.9 (0.9–1.0)    | 0.9 (0.9–0.9)    | 0.8 (0.8–0.8)    | 0.8 (0.8–0.8)    | 0.7 (0.7–0.7)    | 0.6 (0.6–0.6)    | 0.6 (0.6–0.6)    | 0.8                  |
|                    | RSV-coded                           | 0.3 (0.3–0.3)    | 0.3 (0.3–0.4)    | 0.3 (0.3–0.3)    | 0.2 (0.2–0.2)    | 0.2 (0.2–0.2)    | 0.2 (0.2–0.2)    | 0.1 (0.1–0.1)    | 0.2                  |
|                    | RSV assumption for pneumonia        | 0.5 (0.5–0.5)    | 0.5 (0.5–0.5)    | 0.4 (0.4–0.4)    | 0.4 (0.4–0.4)    | 0.4 (0.4–0.4)    | 0.4 (0.4–0.4)    | 0.4 (0.4–0.4)    | 0.4                  |
|                    | RSV assumption for bronchiolitis    | 0.1 (0.1–0.1)    | 0.1 (0.1–0.1)    | 0.1 (0.1–0.1)    | 0.1 (0.1–0.1)    | 0.1 (0.1–0.1)    | 0.1 (0.1–0.1)    | 0.1 (0.1–0.1)    | 0.1                  |

|                    |                                  |               |               |               |               |               |               |               |     |
|--------------------|----------------------------------|---------------|---------------|---------------|---------------|---------------|---------------|---------------|-----|
| <b>50–64 years</b> | RSV-associated                   | 1.8 (1.7–1.8) | 1.6 (1.6–1.7) | 1.5 (1.5–1.5) | 1.5 (1.5–1.5) | 1.4 (1.4–1.4) | 1.4 (1.4–1.4) | 1.3 (1.3–1.4) | 1.5 |
|                    | RSV-coded                        | 0.4 (0.4–0.4) | 0.4 (0.4–0.4) | 0.3 (0.3–0.4) | 0.3 (0.3–0.3) | 0.2 (0.2–0.3) | 0.2 (0.2–0.2) | 0.2 (0.2–0.2) | 0.3 |
|                    | RSV assumption for pneumonia     | 0.9 (0.9–0.9) | 0.8 (0.8–0.8) | 0.7 (0.7–0.8) | 0.8 (0.8–0.8) | 0.8 (0.8–0.8) | 0.8 (0.8–0.8) | 0.7 (0.7–0.8) | 0.8 |
|                    | RSV assumption for bronchiolitis | 0.4 (0.4–0.5) | 0.4 (0.4–0.4) | 0.4 (0.4–0.4) | 0.4 (0.4–0.4) | 0.4 (0.4–0.4) | 0.4 (0.4–0.4) | 0.4 (0.4–0.4) | 0.4 |
| <b>65–74 years</b> | RSV-associated                   | 3.6 (3.5–3.7) | 3.3 (3.2–3.4) | 3.3 (3.2–3.4) | 3.3 (3.2–3.4) | 3.2 (3.2–3.3) | 3.1 (3.1–3.2) | 2.9 (2.9–3.0) | 3.3 |
|                    | RSV-coded                        | 0.5 (0.4–0.5) | 0.5 (0.4–0.5) | 0.5 (0.4–0.5) | 0.4 (0.4–0.4) | 0.4 (0.4–0.4) | 0.4 (0.3–0.4) | 0.3 (0.2–0.3) | 0.4 |
|                    | RSV assumption for pneumonia     | 1.8 (1.7–1.8) | 1.6 (1.5–1.6) | 1.5 (1.5–1.6) | 1.6 (1.5–1.6) | 1.6 (1.5–1.6) | 1.5 (1.5–1.6) | 1.5 (1.4–1.5) | 1.6 |
|                    | RSV assumption for bronchiolitis | 1.3 (1.3–1.4) | 1.3 (1.2–1.3) | 1.3 (1.2–1.3) | 1.3 (1.3–1.4) | 1.3 (1.2–1.3) | 1.3 (1.2–1.3) | 1.2 (1.2–1.3) | 1.3 |
| <b>75–84 years</b> | RSV-associated                   | 5.7 (5.5–5.8) | 5.4 (5.2–5.5) | 5.4 (5.3–5.6) | 5.5 (5.4–5.6) | 5.7 (5.6–5.8) | 5.6 (5.5–5.8) | 5.4 (5.2–5.5) | 5.5 |
|                    | RSV-coded                        | 0.7 (0.6–0.7) | 0.6 (0.6–0.7) | 0.6 (0.6–0.7) | 0.6 (0.6–0.6) | 0.6 (0.6–0.7) | 0.6 (0.6–0.7) | 0.4 (0.4–0.5) | 0.6 |
|                    | RSV assumption for pneumonia     | 3.1 (3.0–3.2) | 2.8 (2.7–3.0) | 2.8 (2.7–2.9) | 2.9 (2.8–3.0) | 3.0 (2.9–3.1) | 2.9 (2.8–3.0) | 2.9 (2.8–3.0) | 2.9 |
|                    | RSV assumption for bronchiolitis | 1.9 (1.8–2.0) | 1.9 (1.8–2.0) | 2.0 (1.9–2.1) | 2.0 (1.9–2.1) | 2.1 (2.0–2.2) | 2.1 (2.0–2.2) | 2.1 (2.0–2.2) | 2.0 |
| <b>≥85 years</b>   | RSV-associated                   | 8.3 (8.0–8.7) | 7.2 (6.9–7.5) | 7.8 (7.5–8.0) | 8.1 (7.8–8.3) | 8.7 (8.4–8.9) | 8.5 (8.2–8.7) | 8.1 (7.9–8.4) | 8.1 |
|                    | RSV-coded                        | 1.3 (1.2–1.5) | 1.0 (0.9–1.1) | 1.1 (1.0–1.2) | 1.2 (1.1–1.2) | 1.3 (1.2–1.4) | 1.3 (1.2–1.4) | 1.1 (1.0–1.2) | 1.2 |
|                    | RSV assumption for pneumonia     | 5.2 (4.9–5.5) | 4.5 (4.3–4.7) | 4.8 (4.6–5.0) | 5.0 (4.8–5.2) | 5.2 (5.0–5.4) | 5.1 (4.9–5.3) | 5.0 (4.8–5.2) | 5.0 |
|                    | RSV assumption for bronchiolitis | 1.8 (1.6–1.9) | 1.7 (1.6–1.8) | 1.9 (1.7–2.0) | 2.0 (1.8–2.1) | 2.1 (2.0–2.2) | 2.1 (1.9–2.2) | 2.0 (1.9–2.2) | 1.9 |

RSV-coded, ICD-9-CM code (079.6, 466.11 or 480.1); RSV assumption for pneumonia, 20% of ICD-9-CM code for all pneumonia (480–486) and influenza with pneumonia (487.0) for <5 years and 9% for ≥5 years; RSV assumption for bronchiolitis 30% of ICD-9-CM code for bronchiolitis (466.1] and obstructive chronic bronchitis (491.2) for <5 years and 9% for ≥5 years.
